# Supplementary material for: Interplay of nucleophilic catalysis with proton transfer in the nitrile reductase QueF from Escherichia coli
Source: Royal Society of Chemistry journal article supplement (doi:10.1039/c8cy02331j), 2019-01-01
Supplement: c8cy02331j1.pdf [file c8cy02331j1.pdf]

## Interplay of nucleophilic catalysis with proton transfer in the nitrile reductase QueF from *Escherichia coli*

Jihye Jung<sup>a,b</sup>, Jan Braun<sup>a</sup>, Tibor Czabany<sup>a,b</sup> and Bernd Nidetzky<sup>\*a,b</sup>

<sup>a</sup> Institute of Biotechnology and Biochemical Engineering, Graz University of Technology, NAWI Graz, Petersgasse 12/1, A-8010 Graz, Austria

E-mail: bernd.nidetzky@tugraz.at; Fax: +43 316 8738434; Tel.: + 43 316 8738400

<sup>b</sup> Austrian Centre of Industrial Biotechnology, Petersgasse 14, A-8010 Graz, Austria

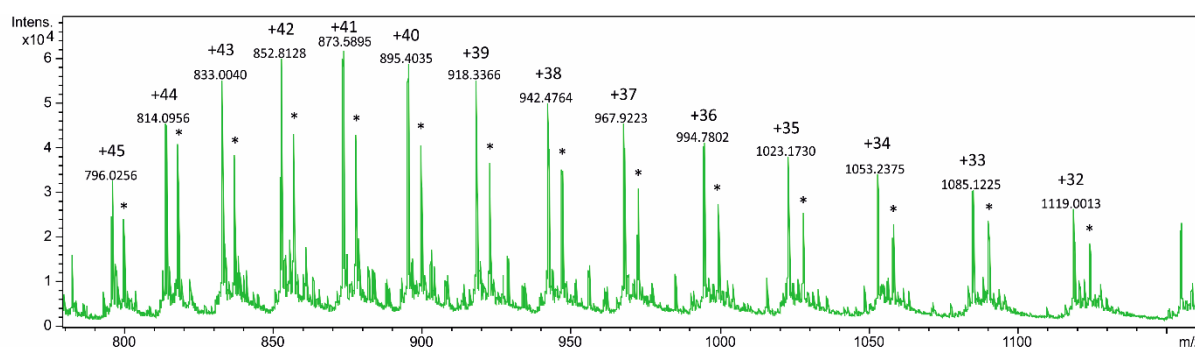

Fig. S1 Protein mass spectrum of ecQueF D197H variant after incubation with preQ<sub>0</sub>. An asterisk on peaks indicates the preQ<sub>0</sub>-bound enzyme complex. The enzyme solution with preQ<sub>0</sub> was prepared and analyzed as described in the section “Experimental” of the main text. Procedures from our earlier study of wildtype ecQueF were used.<sup>1</sup> The deconvoluted data is shown in Fig. 2 of the main text.

### References

1 J. Jung, T. Czabany, B. Wilding, N. Klempier and B. Nidetzky, *J. Biol. Chem.*, 2016, **291**, 25411–25426.
